# Supplementary material
Source: PubMed Central journal article supplement (PMC5538143)

# Brain

## Metabolite Sets Enrichment Overview (Pathway Associated Metabolite Sets)

### A

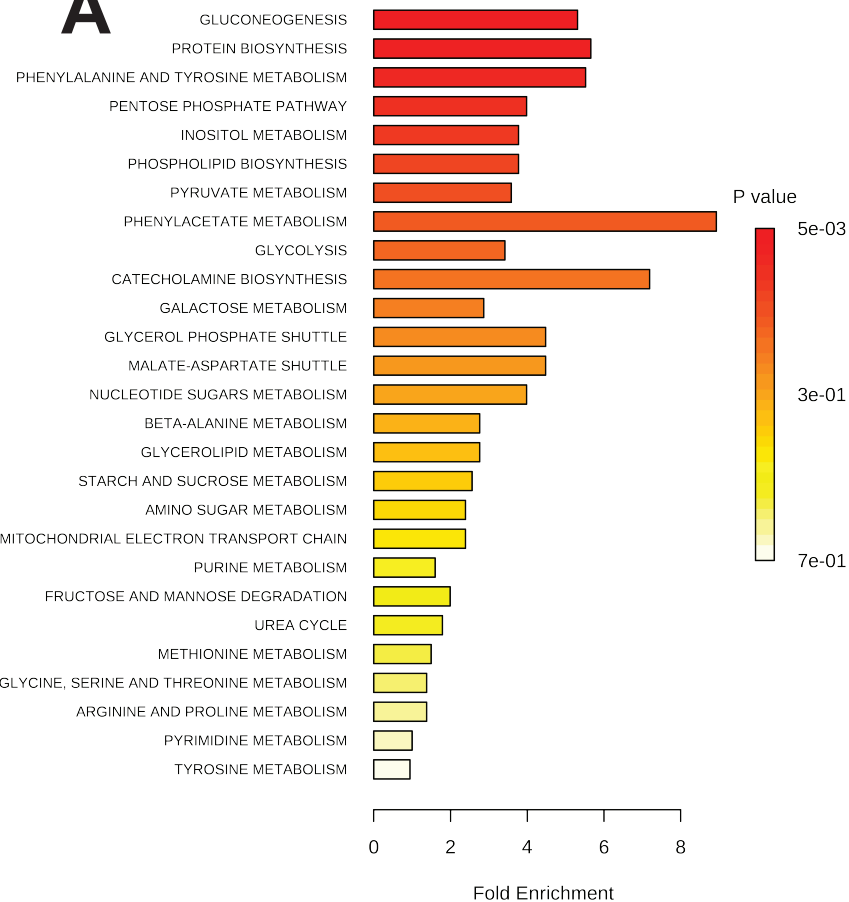

### B

## Metabolite Sets Enrichment Overview (Location Based Metabolite Sets)

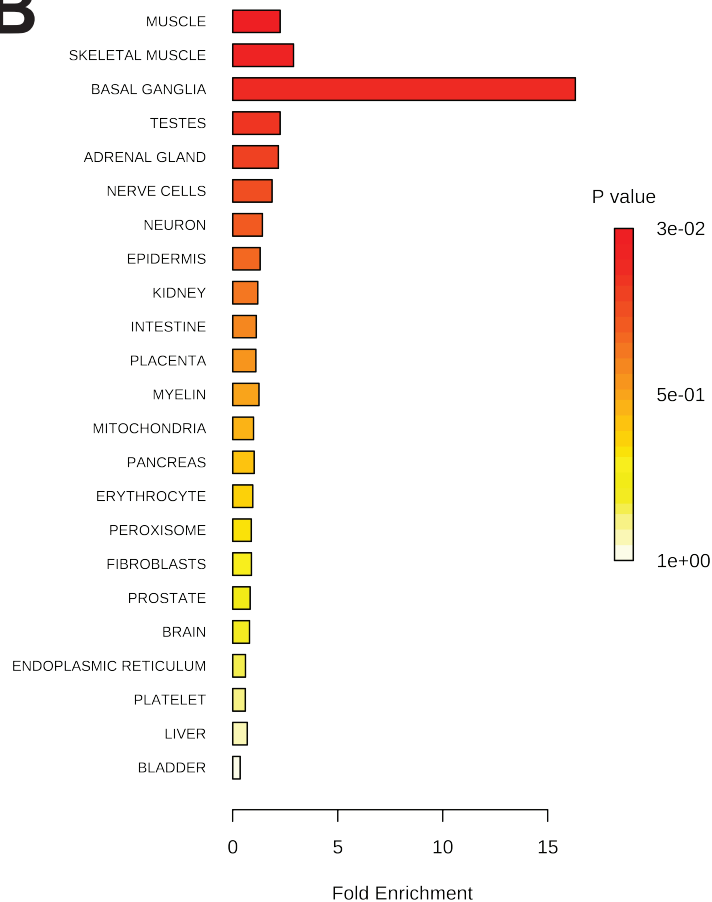

### C

## Metabolite Sets Enrichment Overview (Disease-Associated Metabolite Sets-CSF)

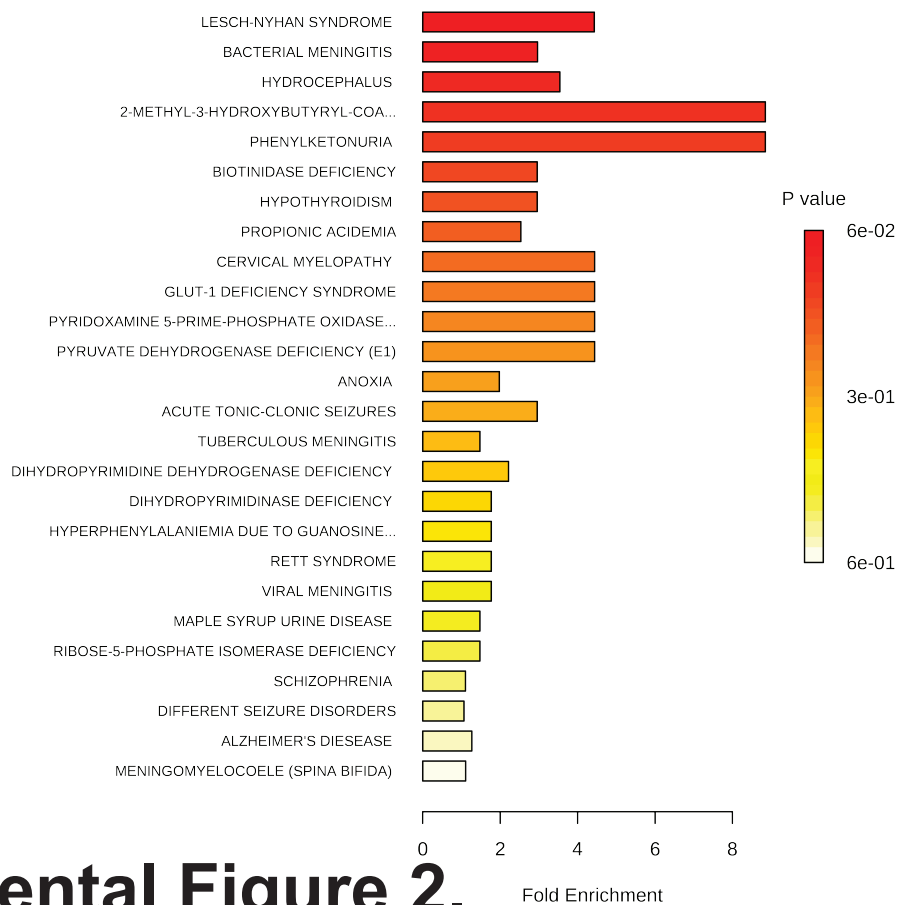

Supplement: NIHMS848235-supplement-Sup_Fig2.pdf [file NIHMS848235-supplement-Sup_Fig2.pdf]
