# Supplementary material
Source: PubMed Central journal article supplement (PMC5538143)

## A

### Metabolite Sets Enrichment Overview (Pathway Associated Metabolite Sets)

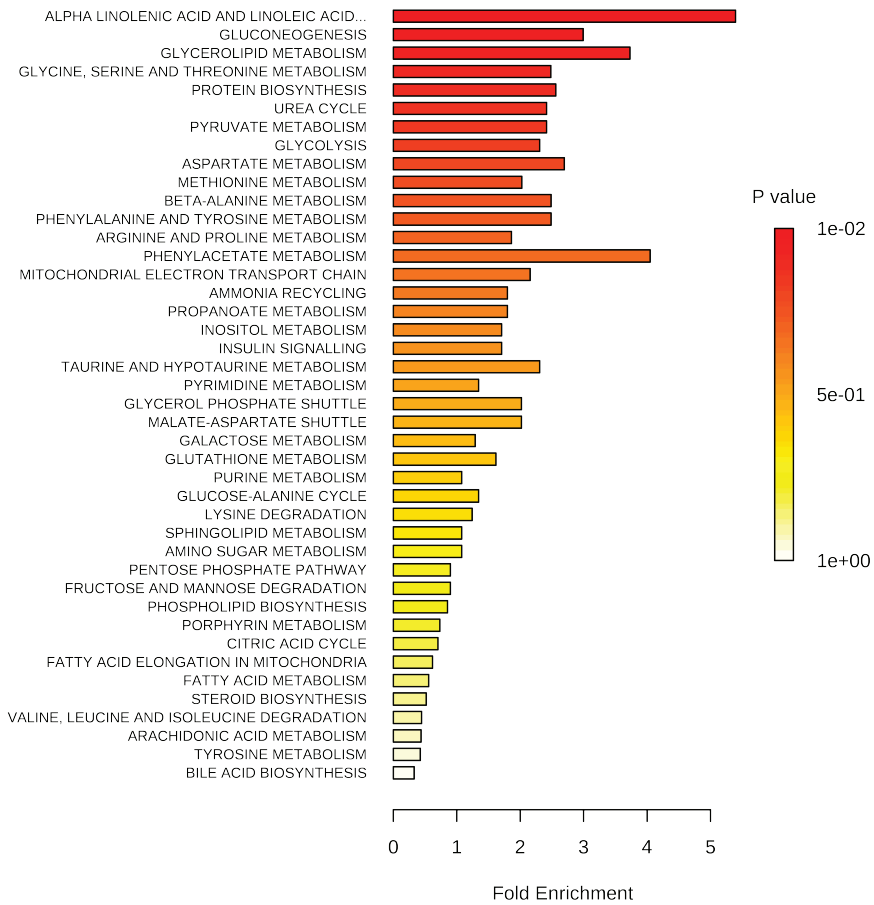

## B

### Metabolite Sets Enrichment Overview (Location Based Metabolite Sets)

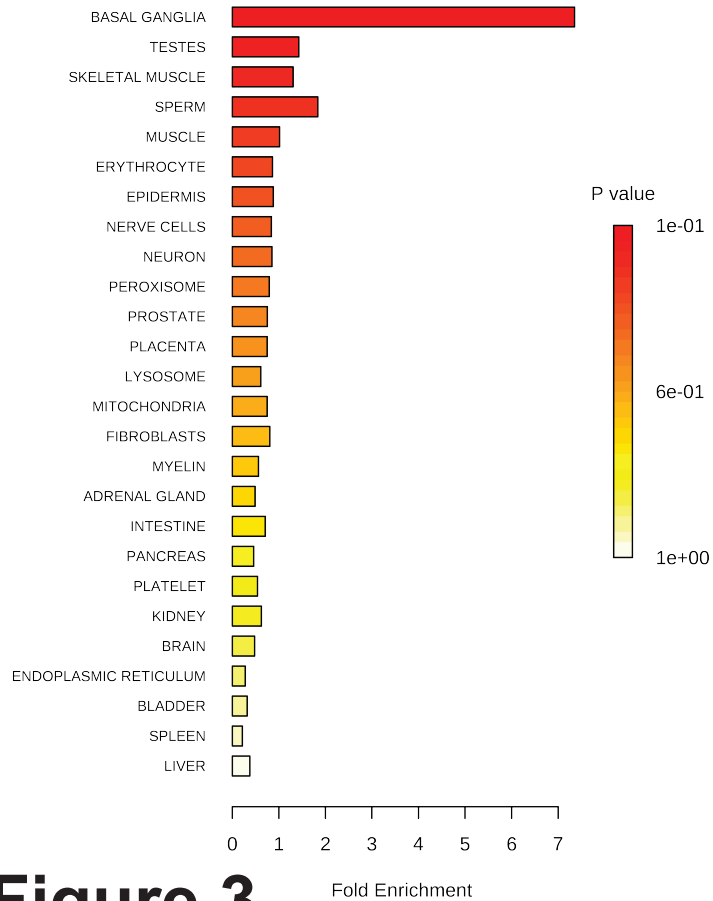

Supplement: NIHMS848235-supplement-Sup_Fig3.pdf [file NIHMS848235-supplement-Sup_Fig3.pdf]
