# Supplementary material
Source: PubMed Central journal article supplement (PMC5538143)
Supplement: NIHMS848235-supplement-Sup_Fig6.pdf [file NIHMS848235-supplement-Sup_Fig6.pdf]

# A Heart: HIP vs. T2D Significant Metabolites (Excluding Amino Acids)

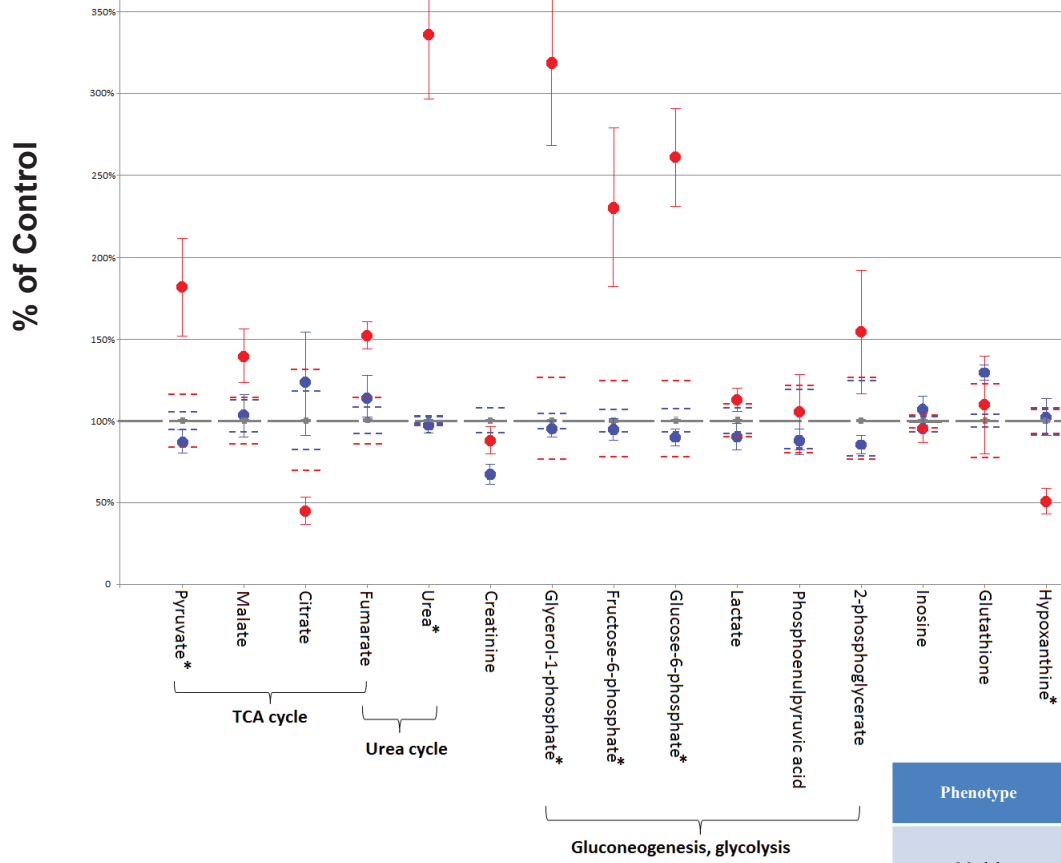

Four Groups:

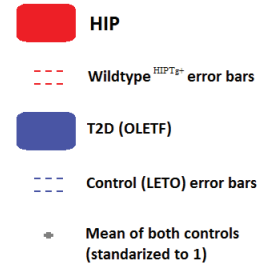

Present Study

Type 2 Diabetes JMCC

\*p < 0.05 HIP vs. T2D

| Phenotype                           | Wildtype            | HIP transgenic      | Wildtype                           | Type 2 diabetes (T2D)                  |
|-------------------------------------|---------------------|---------------------|------------------------------------|----------------------------------------|
| Model                               | Sprague Dawley rats | Sprague Dawley rats | Long-Evans-Tokushima Otsuka rats   | Otsuka Long-Evans-Tokushima fatty rats |
| Age                                 | 12 month old        | 10-12 month old     | 29-35 week old                     | 29-35 week old                         |
| Methods                             | GC-MS Non-targeted  | GC-MS Non-targeted  | CE-TOFMS and CE-MS/MS Non-targeted | CE-TOFMS and CE-MS/MS Non-targeted     |
| Plasma glucose levels (non-fasting) | 97-140 mg/dl        | 445->600 mg/dl      | 115 ± 8                            | 506 ± 34 mg/dl                         |
| Sample size                         | N=8/heart           | N=8/heart           | N=5/heart                          | N=5/heart                              |

C

# B Heart: HIP vs. T2D Amino Acids

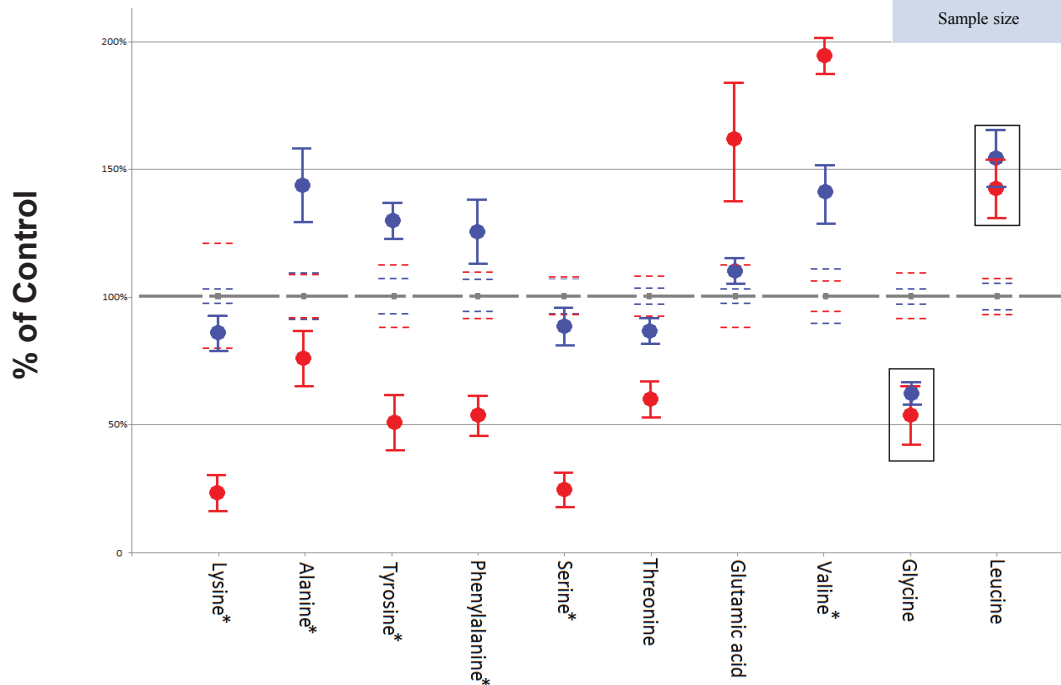

Four Groups:

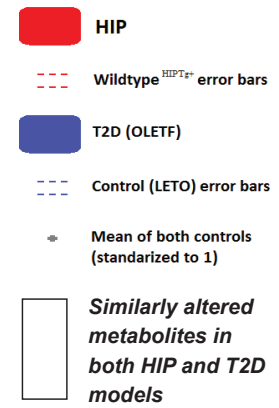

Present Study

Type 2 Diabetes JMCC
