# Supplementary material
Source: PubMed Central journal article supplement (PMC5538143)

# Plasma

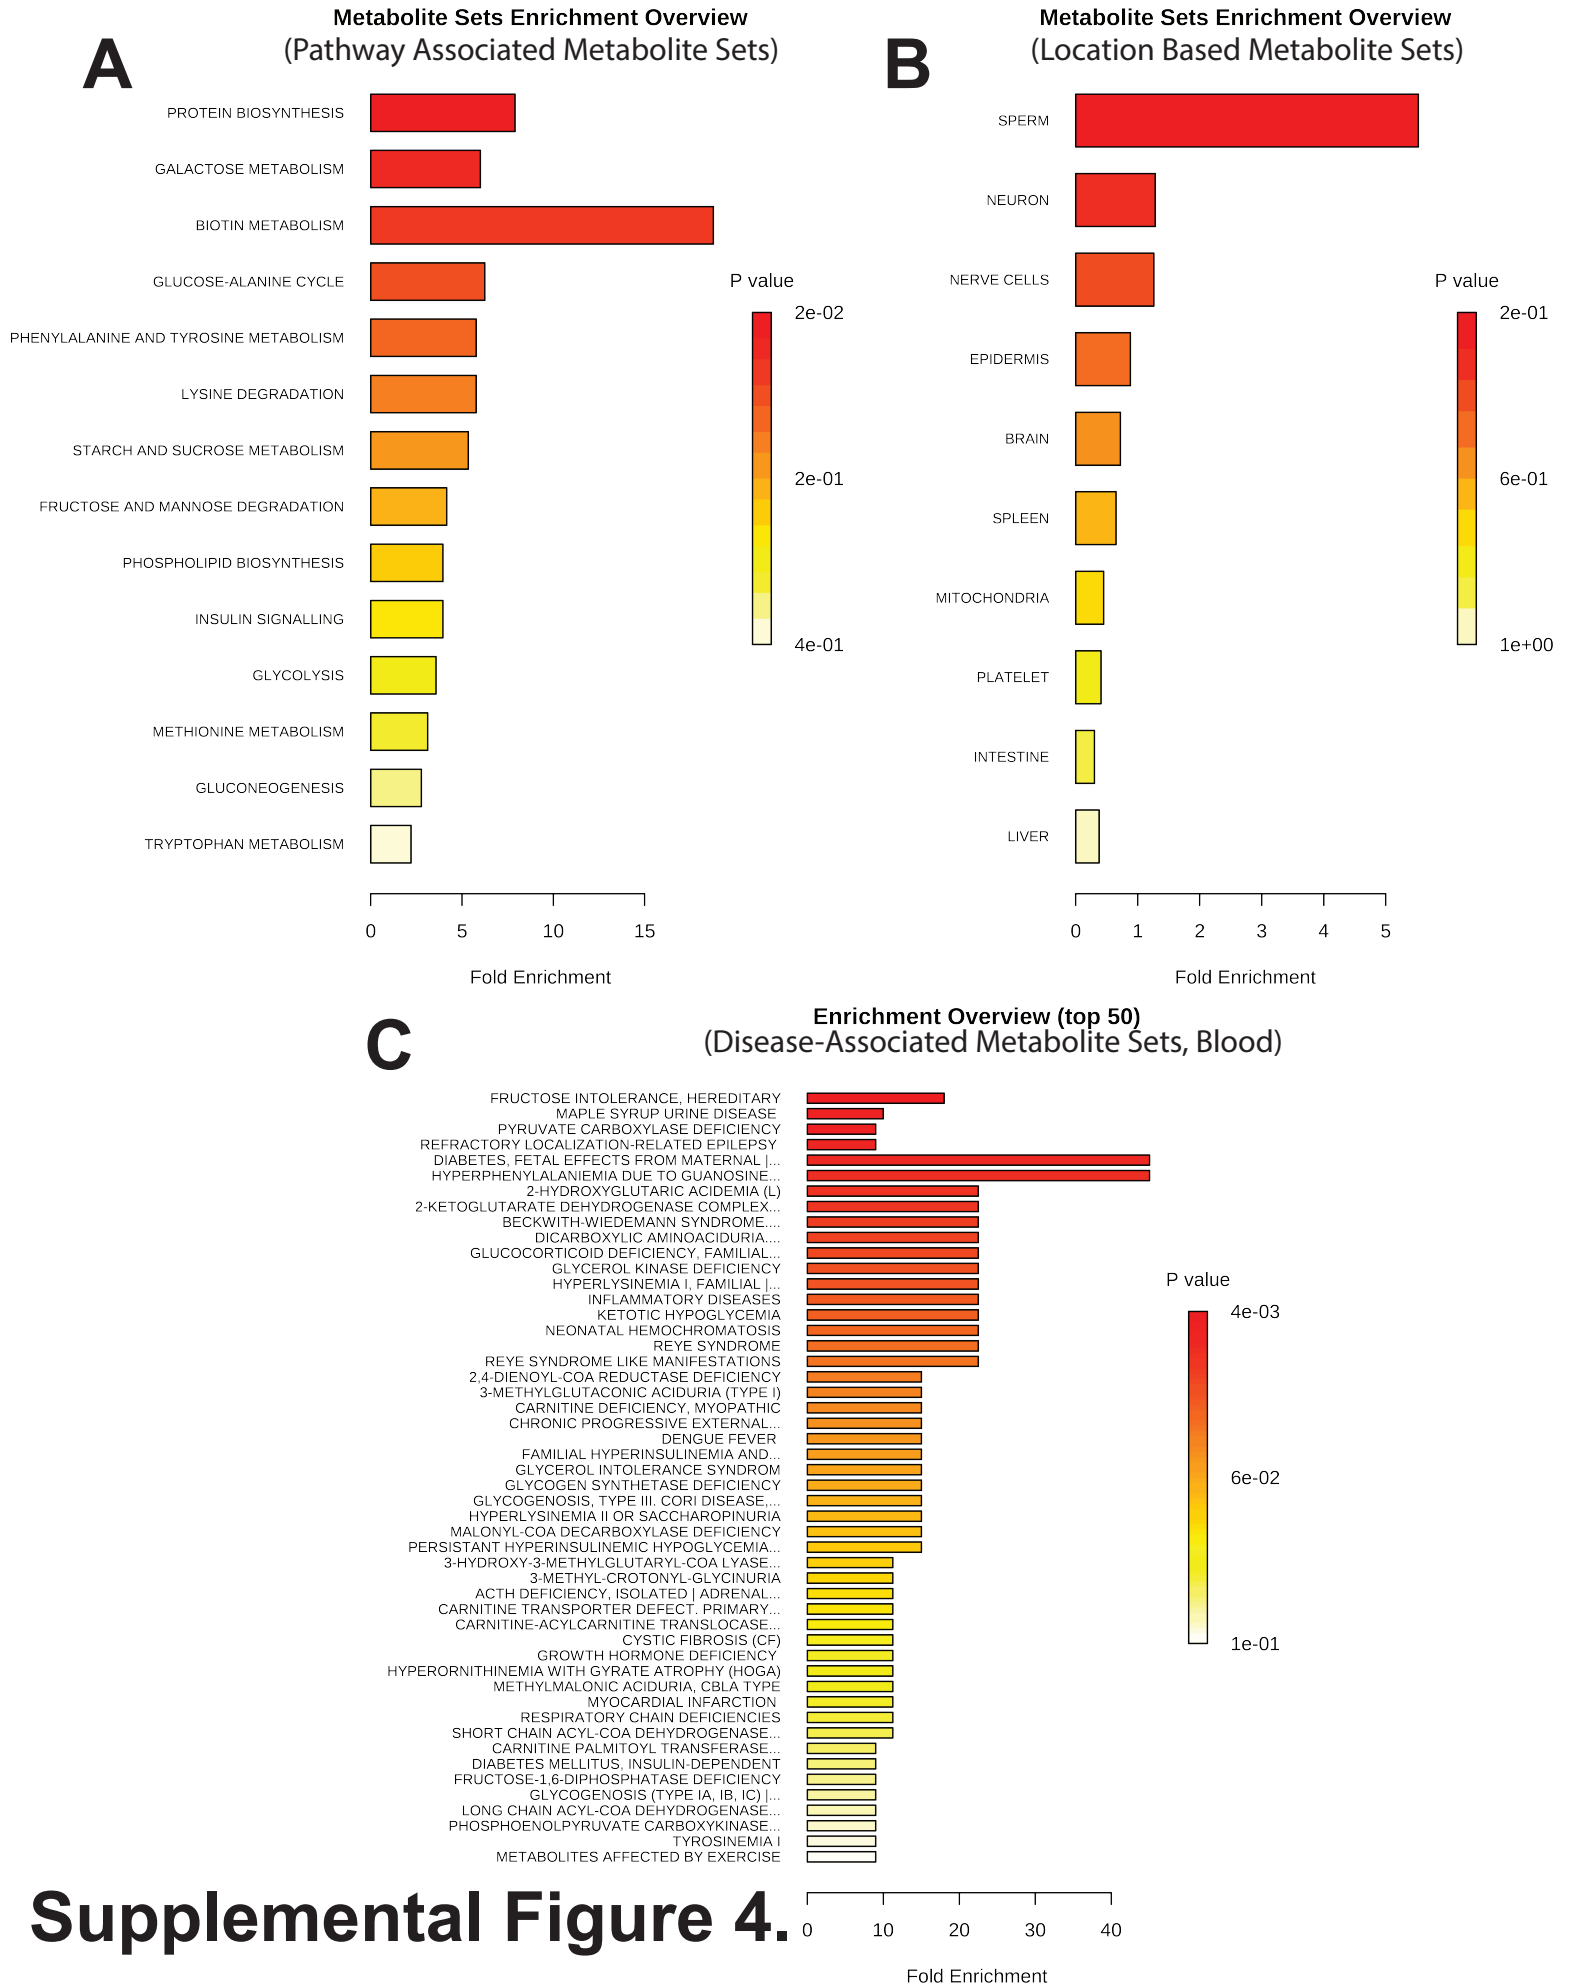

Supplemental Figure 4.

Supplement: NIHMS848235-supplement-Sup_Fig4.pdf [file NIHMS848235-supplement-Sup_Fig4.pdf]
